# Supplementary material for: Sensitivity enhancement in slice-selective NMR experiments through polarization sharing
Source: Royal Society of Chemistry journal article supplement (doi:10.1039/c4cc02978j), 2014-01-01
Supplement: c4cc02978j1.pdf [file c4cc02978j1.pdf]

**Supporting Information.**

**Sensitivity Enhancement in Slice-Selective NMR Experiments through  
Polarization Sharing**

Lokesh and N. Suryaprakash\*

NMR Research Centre, Solid State and Structural Chemistry Unit, Indian Institute of Science,  
Bangalore-560012, India.

Fax: +91 80 23601550;

Tel: +91 80 22933300;

E-mail: [nsp@sif.iisc.ernet.in](mailto:nsp@sif.iisc.ernet.in)

## Contents

### 1. Experimental Details.

#### (A) ASAP-Sel1d and Sel1d

#### (B) Pure-shift ASAP-ZS method and ZS-method

#### (C) ASAP-G-SERF and G-SERF

- Fig S1: ASAP-G-SERF pulse sequence
- Fig S2: ASAP-G-SERF and G-SERF spectrum of Strychnine

#### (D) Pulse program codes used to carry out the experiments.

All the experiments were carried out on a 800 MHz Bruker NMR spectrometer facilitated with cryoprobe. The maximum gradient strength of gradient coil is  $53.5 \text{ Gcm}^{-1}$ .

### **(A) ASAP-Sel1d and Sel1d**

The ASAP-Sel1d and Sel1d are recorded on Propylene carbonate (5mg in 500 ul of  $\text{CDCl}_3$ ).

The ASAP-Sel1d pulse sequence, without initial block consisting of DIPSI-2 and flanked by two gradients constitute normal Sel1d pulse sequence. In both ASAP-Sel1d and Sel1d a  $90^\circ$  Gaussian-shaped pulse with pulse length of 20 ms (band width of 100Hz) is used for selective excitation. In ASAP-Sel1D, DIPSI-2 block of an optimized duration of 40 ms (at 1.14 watt power) flanked by gradients G1 of 33% and G2 of 44% of maximum gradient strength is used for polarization transfer. An acquisition time of 1sec is used in all experiments. The inter scan delay of 2 sec, 75 ms and 35 ms are respectively used in two Sel1d experiments and ASAP-Sel1d experiment.

### **(B) Pure-shift ASAP-ZS and pure-shift ZS experiment.**

The pure-shift ASAP-ZS pulse sequence without initial block consisting of DIPSI-2, flanked by two gradients and last two pulses (hard  $180^\circ$  and soft  $180^\circ$  pulses) constitute pure-shift ZS pulse sequence.

**The ASAP-ZS and ZS experiments are recorded on sample mixture of propylene carbonate,  $\gamma$ -valerolactone, 1-indanol and *L*-menthol in  $\text{CDCl}_3$  (each of them taken as 5 mg or 5 ul in 500 ul of  $\text{CDCl}_3$ )**

The first pure-shift ZS experiment is recorded in 5.24 min with 4 scans at each data point, dummy scans of 2 and inter scan delay of 2 sec. The second pure-shift ZS experiment is recorded in 5.24 min with 16 scans at each data point, dummy scans of 4 and inter scan delay of 135 ms.

The ASAP-ZS experiment is recorded in 5.28 min with number of scans of 16 at each data point, dummy scans of 4 and inter scan delay of 35 ms. In ASAP-ZS the polarization transfer is achieved by initial DIPSI-2 block with duration of 40 ms (at 1.14 watt power) flanked by gradients G1 of 33% and G2 of 44% of maximum gradient strength. The other experimental parameters remained constant in both cases.

In all the experiments, selective  $90^\circ$  EBurp-shaped pulse and  $180^\circ$  ReBurp-shaped pulse with pulse length of 60 ms (band width of 100Hz) are used. Slice selection is achieved by using GS of 1% of maximum gradient strength. The coherence selection is achieved by G3 of 26 and -G3 of -26% of maximum gradient strength. Acquisition time of 0.213 sec and 0.16 s with data points

of 2048 X 32, corresponding to spectral width of 4795 Hz and 100 Hz along  $F_2$  and  $F_1$  dimensions respectively are used.

### The ASAP-ZS and ZS experiments are recorded on 50mM cyclosporin-A sample in $C_6D_6$

The first pure-shift ZS experiment is recorded in 5.26 min with 4 scans at each data point, dummy scans of 2 and inter scan delay of 2 sec. The second pure-shift ZS experiment is recorded in 5.33 min with 16 scans at each data point, dummy scans of 4 and inter scan delay of 135 ms.

The ASAP-ZS experiment is recorded in 5.13 min with number of scans of 16 at each data point, dummy scans of 4 and inter scan delay of 35 ms. In ASAP-ZS the polarization transfer is achieved by initial DIPSI-2 block with duration of 40 ms (at 1.14 watt power) flanked by gradients G1 of 33% and G2 of 44% of maximum gradient strength. The other experimental parameters remained constant in both cases.

In both experiments, selective  $90^\circ$  EBurp-shaped pulse and  $180^\circ$  ReBurp-shaped pulse with pulse length of 60 ms (band width of 100Hz) are used. Slice selection is achieved by using GS of 0.7% of maximum gradient strength. The coherence selection is achieved by G3 of 26 and -G3 of -26% of maximum gradient strength. Acquisition time of 0.319 sec and 0.16 s with data points of 2048 X 32, corresponding to spectral width of 3201 Hz and 100 Hz along  $F_2$  and  $F_1$  dimensions respectively are used in both experiments.

### (C) ASAP-G-SERF and G-SERF experiment.

ASAP-G-SERF and G-SERF experiment on *L*-menthol and Strychnine.

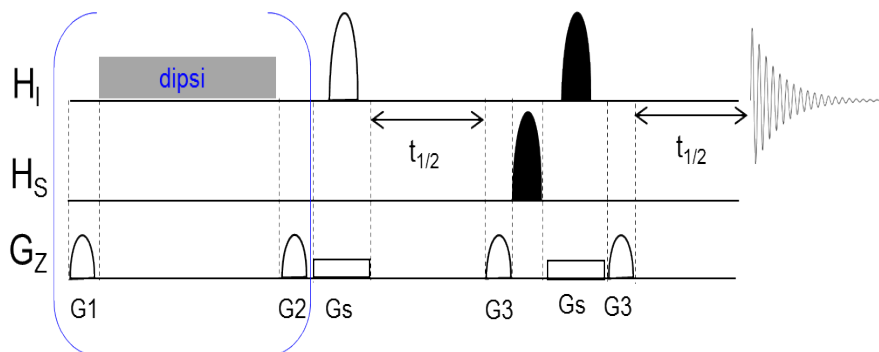

**Fig. S1:** The pulse sequence of ASAP-G-SERF. Without the initial blue block consisting of DIPSI-2 block flanked by two gradients G1 and G2 constitute normal G-SERF pulse sequence.

### **Experimental details of ASAP-G-SERF and G-SERF spectra of *L*-menthol.**

First G-SERF is recorded in 11 min 33 sec with number of scans 4, dummy scans 2 and inter scan relaxation delay of 2 s. The second G-SERF is recorded in 11 min 43 sec with number of scans 16, dummy scans 4 and inter scan relaxation delay of 75 ms.

ASAP-G-SERF is recorded in 11 min 45 sec with number of scans 8, dummy scans 4 and inter scan delay of 35 ms. In ASAP-G-SERF the polarization transfer is achieved by initial DIPSI-2 block with duration of 40 ms (at 1.14 watt power), which is flanked by gradients G1 of 33% and G2 of 44% of maximum gradient strength prior to G-SERF pulse sequence.

The other experimental parameters are maintained identical in both cases. Selective  $90^\circ$  EBurp-shaped pulse and  $180^\circ$  ReBurp-shaped pulse with pulse length of 60 ms (band width of 100Hz) are used. Slice selection is achieved by using GS of 0.7% of maximum gradient strength. The coherence selection is achieved by G3 of 26 of maximum gradient strength. The acquisition time of 0.319 sec and 0.8 sec with data points of 2048 X 64, corresponding to spectral width of 3201 Hz and 40 Hz along  $F_2$  and  $F_1$  dimensions respectively are used.

**Experimental details and spectra of ASAP-G-SERF and G-SERF of Strychnine (5 mg in 500 ul).**

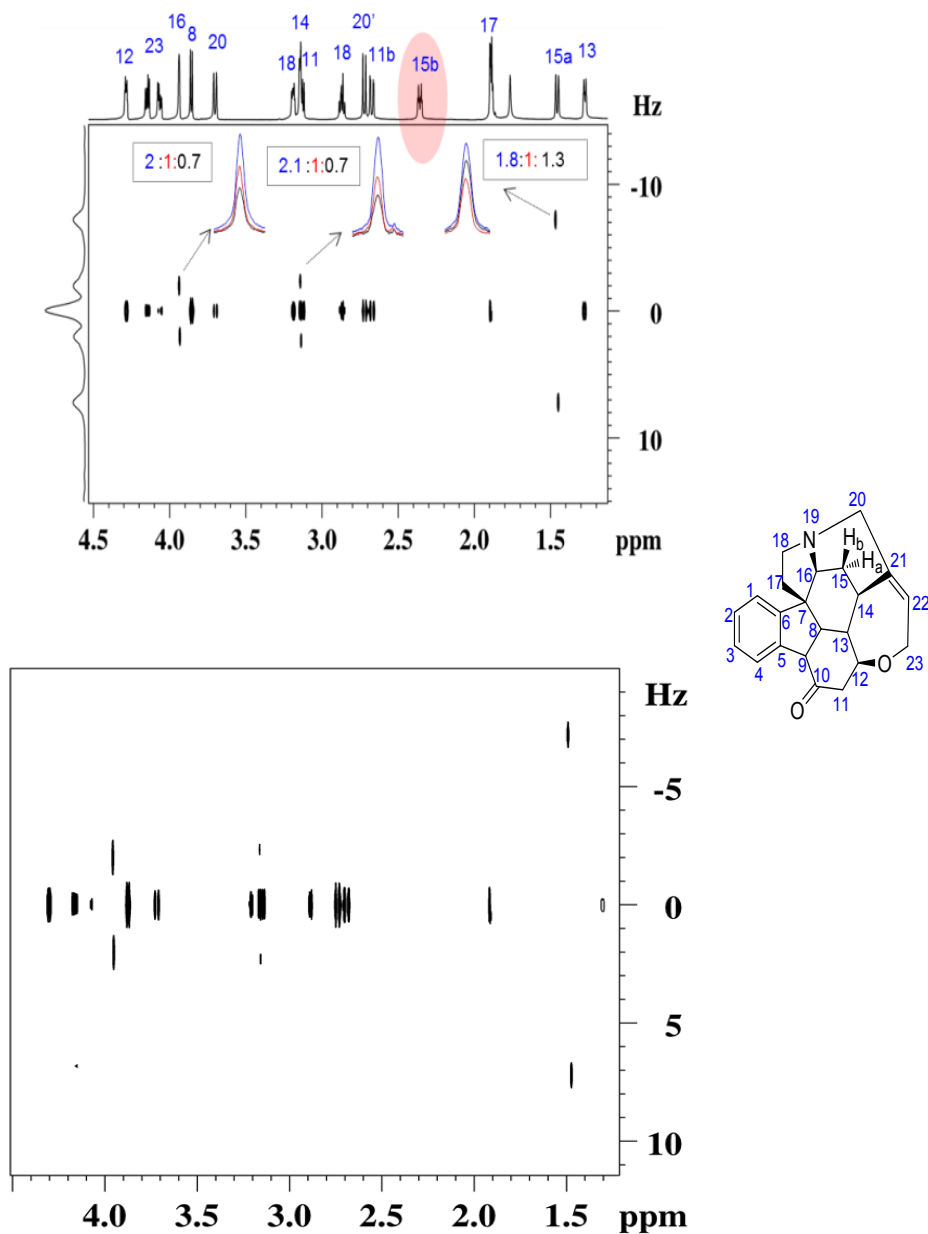

**Fig. S2:** Chemical structure, ASAP-G-SERF (above) and G-SERF (below) 2D <sup>1</sup>H spectrum of strychnine. The intensities of cross peaks from ASAP-G-SERF (blue) are compared with that of

G-SERF with 95 ms (black) and 2 s (red) inter-scan delay, shows nearly 2-fold sensitivity enhancement per unit time in ASAP-G-SERF spectrum (blue).

The first G-SERF is recorded in 15 min 39 sec with number of scans 4, dummy scans 2 and inter scan relaxation delay of 1.9 s. The second G-SERF is recorded in 15 min 45 sec with number of scans 8, dummy scans 4 and inter scan relaxation delay of 95 ms.

ASAP-G-SERF is recorded in 14 min 56 sec with number of scans 8, dummy scans 4 and inter scan delay of 50 ms. In ASAP-G-SERF the polarization transfer is achieved by initial DIPSI-2 block with duration of 40 ms (at 1.14 watt power), which is flanked by gradients G1 of 33% and G2 of 44% of maximum gradient strength prior to G-SERF pulse sequence.

The other experimental parameters are maintained identical in both cases. Selective  $90^\circ$  EBurp-shaped pulse and  $180^\circ$  ReBurp-shaped pulse with pulse length of 60 ms (band width of 100Hz) are used. Slice selection is achieved by using GS of 0.7 % of maximum gradient strength. The coherence selection is achieved by G3 of 26% of maximum gradient strength. The acquisition time of 0.51 sec and 1.06 sec with data points of 4096 X 64, corresponding to spectral width of 4000 Hz and 30Hz along  $F_2$  and  $F_1$  dimensions respectively are used.

## Pulse Program Codes

### 1. ASAP-ZS pulse program code for Bruker NMR spectrometer

```
#include <Avance.incl>  
#include <Grad.incl>  
#include <Delay.incl>
```

```
"in0=inf1/2"  
"p2=p1*2"  
"d0=3u"  
"FACTOR1=(d9/(p6*115.112))/2+0.5"  
"l1=FACTOR1*2"
```

```
1 ze  
2 d1  
  50u UNBLKGRAD  
  p16:gp1  
  d16  
  d20 p110:f1
```

```
      ;begin DIPS12
```

```
3 p6*3.556 ph23  
  p6*4.556 ph25  
  p6*3.222 ph23  
  p6*3.167 ph25  
  p6*0.333 ph23  
  p6*2.722 ph25  
  p6*4.167 ph23  
  p6*2.944 ph25  
  p6*4.111 ph23
```

```
  p6*3.556 ph25  
  p6*4.556 ph23  
  p6*3.222 ph25  
  p6*3.167 ph23  
  p6*0.333 ph25  
  p6*2.722 ph23  
  p6*4.167 ph25  
  p6*2.944 ph23  
  p6*4.111 ph25
```

```
  p6*3.556 ph25  
  p6*4.556 ph23  
  p6*3.222 ph25
```



p6\*3.167 ph23  
p6\*0.333 ph25  
p6\*2.722 ph23  
p6\*4.167 ph25  
p6\*2.944 ph23  
p6\*4.111 ph25

p6\*3.556 ph23  
p6\*4.556 ph25  
p6\*3.222 ph23  
p6\*3.167 ph25  
p6\*0.333 ph23  
p6\*2.722 ph25  
p6\*4.167 ph23  
p6\*2.944 ph25  
p6\*4.111 ph23  
lo to 3 times l1  
;end DIPSI2

d21  
p16:gp2  
d16  
4u p10:f1  
300u gron2 ; Slice selection gradient On  
(p11:sp1 ph1):f1 ; 90 (selective)  
100u groff ; Slice selection gradient Off  
200u  
d0  
4u  
p17:gp3  
d16 p11:f1  
(p2 ph2):f1  
4u p10:f1  
300u gron2 ; Slice selection gradient On  
(p12:sp2 ph2):f1 ; 180 (selective)  
100u groff ; Slice selection gradient Off  
200u  
4u  
p17:gp4  
d16  
d0  
4u  
p17:gp3  
d16 p11:f1  
(p2 ph2):f1  
4u p10:f1

```
300u gron2      ; Slice selection gradient On
(p12:sp2 ph2):f1 ; 180 (selective)
100u groff      ; Slice selection gradient Off
200u
4u
p17:gp4
d16
50u BLKGRAD
go=2 ph31
30m mc #0 to 2 F1QF(id0)
exit
```

```
ph1 = 0 0
ph2 = 1 3
ph23 =3
ph25 =1
ph31 =0 0
```

```
;p11 : High power
;p11: 90 degree shape pulse
;p12: 180 degree shape pulse
;sp1: 90 degree shape pulse power label
;sp2: 180 degree shape pulse power label
;p1 : f1 channel - 90 degree high power pulse
;d0 : incremented delay (2D) [3 usec]
;d1 : relaxation delay; 1-5 * T1
;in0: 1/(1 * SW) = 2 * DW
;nd0: 2
;NS: 2 * n
;DS: 8
;td1: number of t1 increments
;MC2: QF
```

## 2. ASAP-G\_SERF pulse program code for Bruker NMR spectrometer

```
#include <Avance.incl>
#include <Grad.incl>
#include <Delay.incl>

"in0=inf1/2"
"p2=p1*2"
"d0=3u"
"FACTOR1=(d9/(p6*115.112))/2+0.5"
"i1=FACTOR1*2"

1 ze
2 d1
  50u UNBLKGRAD
  p16:gp1
  d16
  d20 p110:f1

                                     ;begin DIPSI2
3 p6*3.556 ph23
  p6*4.556 ph25
  p6*3.222 ph23
  p6*3.167 ph25
  p6*0.333 ph23
  p6*2.722 ph25
  p6*4.167 ph23
  p6*2.944 ph25
  p6*4.111 ph23

  p6*3.556 ph25
  p6*4.556 ph23
  p6*3.222 ph25
  p6*3.167 ph23
  p6*0.333 ph25
  p6*2.722 ph23
  p6*4.167 ph25
  p6*2.944 ph23
  p6*4.111 ph25

  p6*3.556 ph25
  p6*4.556 ph23
  p6*3.222 ph25
  p6*3.167 ph23
```

p6\*0.333 ph25  
p6\*2.722 ph23  
p6\*4.167 ph25  
p6\*2.944 ph23  
p6\*4.111 ph25

p6\*3.556 ph23  
p6\*4.556 ph25  
p6\*3.222 ph23  
p6\*3.167 ph25  
p6\*0.333 ph23  
p6\*2.722 ph25  
p6\*4.167 ph23  
p6\*2.944 ph25  
p6\*4.111 ph23  
lo to 3 times ll  
;end DIPS12

d21  
p16:gp2  
d16  
4u p10:f1  
300u gron2 ; Slice selection gradient On  
(p11:sp1 ph1):f1 ; 90 (selective)  
100u groff ; Slice selection gradient Off  
200u  
d0  
4u  
p17:gp3  
d16  
(p14:sp4 ph2):f1  
4u  
300u gron2 ; Slice selection gradient On  
(p12:sp2 ph2):f1 ; 180 (selective)  
100u groff ; Slice selection gradient Off  
200u  
4u  
p17:gp3  
d16  
d0  
50u BLKGRAD  
go=2 ph31  
30m mc #0 to 2 F1QF(id0)  
exit

ph1 = 0 0  
ph2 = 1 3  
ph23 = 3  
ph25 = 1  
ph31 = 0 0

;p11 : High power  
;p11: 90 degree shape pulse  
;p12: 180 degree shape pulse  
;sp1: 90 degree shape pulse power label  
;sp2: 180 degree shape pulse power label  
;p1 : f1 channel - 90 degree high power pulse  
;d0 : incremented delay (2D) [3 usec]  
;d1 : relaxation delay; 1-5 \* T1  
;in0:  $1/(1 * SW) = 2 * DW$   
;nd0: 2  
;NS: 2 \* n  
;DS: 8  
;td1: number of t1 increments  
;MC2: QF
